# Supplementary material for: Metabolite Differences of Polyphenols in Different Litchi Cultivars (Litchi chinensis Sonn.) Based on Extensive Targeted Metabonomics
Source: PubMed Central journal article supplement (PMC7926386; doi:10.3390/molecules26041181), 2021-02-23
Supplement: molecules-26-01181-s001.pdf [file molecules-26-01181-s001.pdf]

# Supplementary material

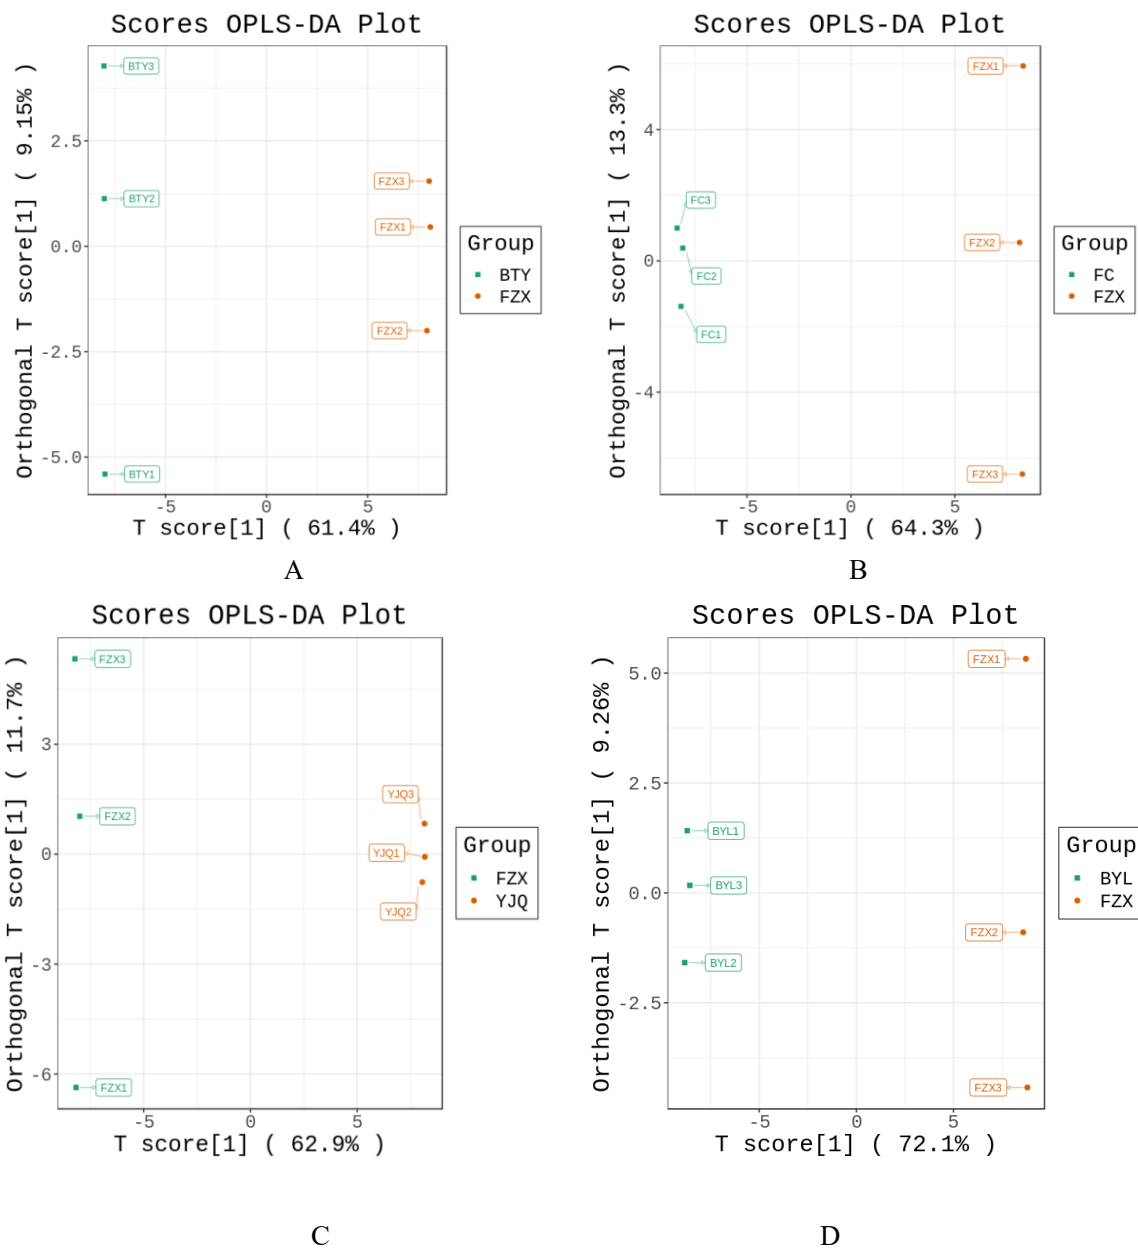

**Figure S1.** OPLS-DA diagrams among litchi cultivars

Note: (A) BTY vs. FZX; (B) FC vs. FZX; (C) YJQ vs. FZX; (D) BYL vs. FZX.

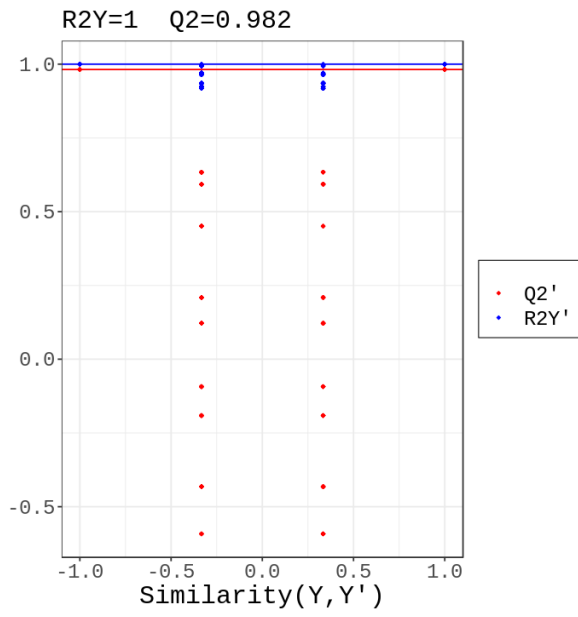

A

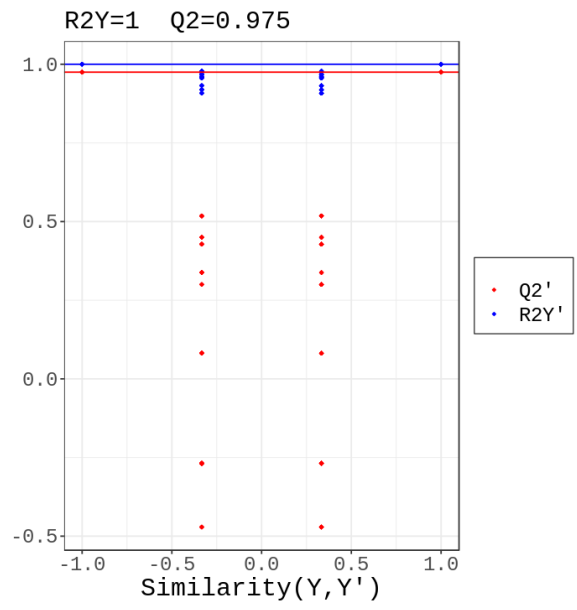

B

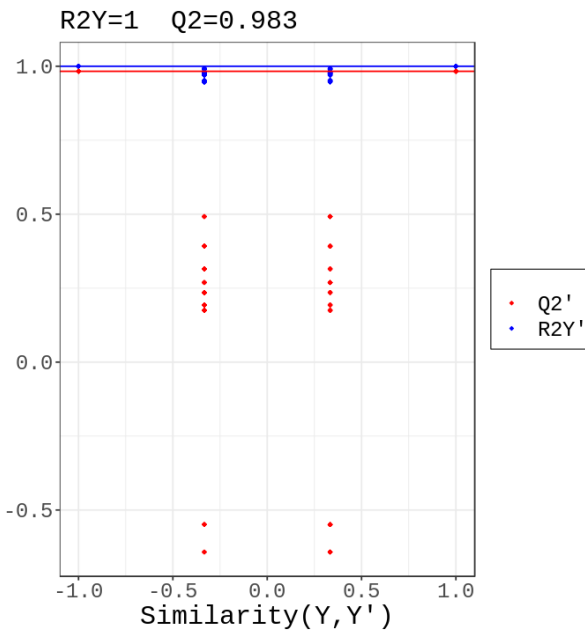

C

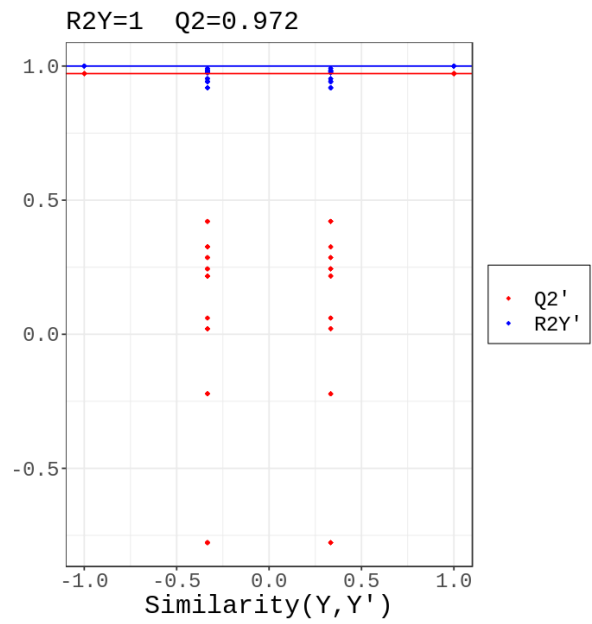

D

**Figure S2.** Verification diagrams of OPLS-DA model among litchi cultivars

Note: (A) BTY vs. FZX; (B) FC vs. FZX; (C) YJQ vs. FZX; (D) BYL vs. FZX. The horizontal line corresponds to R2Y and Q2 of the original model, the red and blue dots respectively represent R2Y' and Q2' of the model after replacement.

**Table S2** Identification information of common difference metabolites

| NO. | Compounds                                            | Class             | Molecular Weight (Da) | Formula                                         | CAS No.    | Rt (min) | VIP  | P      | Tend        |            |             |             |
|-----|------------------------------------------------------|-------------------|-----------------------|-------------------------------------------------|------------|----------|------|--------|-------------|------------|-------------|-------------|
|     |                                                      |                   |                       |                                                 |            |          |      |        | BTY vs. FZX | FC vs. FZX | YJQ vs. FZX | BYL vs. FZX |
| 1   | Tricetin<br>O-malonylhexoside                        | Flavone           | 550.00                | C <sub>24</sub> H <sub>22</sub> O <sub>15</sub> | -          | 4.52     | 1.21 | 0      | ↑           | ↓          | ↓           | ↓           |
| 2   | 1-O-β-D-Glucopyranosyl sinapate                      | Hydroxycinnamoyls | 386.10                | C <sub>17</sub> H <sub>22</sub> O <sub>10</sub> | 78185-48-5 | 3.15     | 1.24 | 0      | ↓           | ↓          | ↓           | ↓           |
| 3   | Luteolin<br>O-hexosyl-O-hexosyl-O-hexoside           | Flavone           | 772.10                | C <sub>33</sub> H <sub>40</sub> O <sub>21</sub> | -          | 2.53     | 1.24 | 0      | ↓           | ↓          | ↓           | ↓           |
| 4   | Ferulic acid                                         | Hydroxycinnamoyls | 194.06                | C <sub>10</sub> H <sub>10</sub> O <sub>4</sub>  | 1135-24-6  | 4.03     | 1.21 | 0      | ↓           | ↑          | ↓           | ↑           |
| 5   | Quercetin<br>3-α-L-arabinofuranoside<br>(Avicularin) | Flavonol          | 434.08                | C <sub>20</sub> H <sub>18</sub> O <sub>11</sub> | 572-30-5   | 3.96     | 1.22 | 0      | ↓           | ↓          | ↓           | ↓           |
| 6   | Kaempferol<br>3-O-rutinoside<br>(Nicotiflorin)       | Flavonol          | 594.16                | C <sub>27</sub> H <sub>30</sub> O <sub>15</sub> | 17650-84-9 | 3.79     | 1.24 | 0      | ↓           | ↓          | ↓           | ↓           |
| 7   | Nobiletin                                            | Flavone           | 402.13                | C <sub>21</sub> H <sub>22</sub> O <sub>8</sub>  | 478-01-3   | 7.02     | 1.22 | 0      | ↓           | ↑          | ↓           | ↓           |
| 8   | Tangeretin                                           | Flavone           | 372.12                | C <sub>20</sub> H <sub>20</sub> O <sub>7</sub>  | 481-53-8   | 7.5      | 1.22 | 0.0096 | ↓           | ↑          | ↓           | ↓           |
| 9   | Kaempferol<br>3-O-glucoside<br>(Astragaln)           | Flavonol          | 448.10                | C <sub>21</sub> H <sub>20</sub> O <sub>11</sub> | 480-10-4   | 4.03     | 1.24 | 0      | ↓           | ↓          | ↓           | ↓           |
| 10  | Coniferyl alcohol                                    | Hydroxycinnamoyls | 180.08                | C <sub>10</sub> H <sub>12</sub> O <sub>3</sub>  | 458-35-5   | 3.86     | 1.14 | 0      | ↓           | ↑          | ↓           | ↑           |
| 11  | Quercetin<br>4'-O-glucoside<br>(Spiraeoside)         | Flavonol          | 464.10                | C <sub>21</sub> H <sub>20</sub> O <sub>12</sub> | 20229-56-5 | 3.8      | 1.20 | 0      | ↓           | ↓          | ↓           | ↓           |
| 12  | Quercetin<br>3-O-glucoside<br>(Isotrifoliin)         | Flavonol          | 464.10                | C <sub>21</sub> H <sub>20</sub> O <sub>12</sub> | 21637-25-2 | 3.81     | 1.21 | 0      | ↓           | ↓          | ↓           | ↓           |
| 13  | Kaempferol<br>3-O-galactoside<br>(Trifolin)          | Flavonol          | 448.10                | C <sub>21</sub> H <sub>20</sub> O <sub>11</sub> | 23627-87-4 | 3.99     | 1.24 | 0      | ↓           | ↓          | ↓           | ↓           |
| 14  | p-Coumaryl alcohol                                   | Hydroxycinnamoyls | 150.07                | C <sub>9</sub> H <sub>10</sub> O <sub>2</sub>   | 3690-05-9  | 3.5      | 1.24 | 0      | ↓           |            | ↓           | ↑           |
| 15  | p-Coumaraldehyde                                     | Hydroxycinnamoyls | 148.05                | C <sub>9</sub> H <sub>8</sub> O <sub>2</sub>    | 2538-87-6  | 4.12     | 1.22 | 0      | ↓           |            | ↓           | ↓           |

**Table S3** Identification information of different metabolites specific to each group of cultivars

| Group       | Compounds                            | Class             | Molecular Weight (Da) | Formula                                         | CAS No.    | Rt (min) | VIP  | Log2FC | Type |
|-------------|--------------------------------------|-------------------|-----------------------|-------------------------------------------------|------------|----------|------|--------|------|
| BTY vs. FZX | Syringetin 7-O-hexoside              | Flavone           | 508.10                | C <sub>23</sub> H <sub>24</sub> O <sub>13</sub> | -          | 4.10     | 1.27 | 3.42   | ↑    |
|             | Sakuranetin                          | Flavone           | 286.08                | C <sub>16</sub> H <sub>14</sub> O <sub>5</sub>  | 2957-21-3  | 6.92     | 1.23 | -1.51  | ↓    |
|             | Dihydromyricetin                     | Flavonol          | 320.05                | C <sub>15</sub> H <sub>12</sub> O <sub>8</sub>  | 27200-12-0 | 3.47     | 1.24 | 1.01   | ↑    |
| FC vs. FZX  | Protocatechuic acid                  | Catechins         | 154.03                | C <sub>7</sub> H <sub>6</sub> O <sub>4</sub>    | 99-50-3    | 2.55     | 1.22 | 1.75   | ↑    |
| YJQ vs. FZX | Chrysoeriol 7-O-rutinoside           | Flavone           | 608.10                | C <sub>28</sub> H <sub>32</sub> O <sub>15</sub> | -          | 3.99     | 1.10 | 1.34   | ↑    |
| BYL vs. FZX | MethylQuercetin O-hexoside           | Flavonol          | 478.00                | C <sub>22</sub> H <sub>22</sub> O <sub>12</sub> | -          | 3.84     | 1.05 | -1.58  | ↓    |
|             | Isorhamnetin O-hexoside              | Flavonol          | 478.20                | C <sub>22</sub> H <sub>22</sub> O <sub>12</sub> | -          | 4.11     | 1.12 | -1.71  | ↓    |
|             | Luteolin 3',7-di-O-glucoside         | Flavone           | 610.10                | C <sub>27</sub> H <sub>30</sub> O <sub>16</sub> | 52187-80-1 | 3.38     | 1.04 | -1.13  | ↓    |
|             | Isorhamnetin 5-O-hexoside            | Flavonol          | 478.20                | C <sub>22</sub> H <sub>22</sub> O <sub>12</sub> | -          | 4.00     | 1.09 | -1.49  | ↓    |
|             | Chrysoeriol O-hexosyl-O-hexoside     | Flavone           | 624.10                | C <sub>28</sub> H <sub>32</sub> O <sub>16</sub> | -          | 4.12     | 1.14 | -1.60  | ↓    |
|             | Procyanidin A3                       | Proanthocyanidins | 576.10                | C <sub>30</sub> H <sub>24</sub> O <sub>12</sub> | 86631-39-2 | 2.87     | 1.15 | -1.58  | ↓    |
|             | Tricin 7-O-hexoside                  | Flavone           | 492.10                | C <sub>23</sub> H <sub>24</sub> O <sub>12</sub> | -          | 4.21     | 1.14 | 1.67   | ↑    |
|             | 3-O-p-Coumaroyl quinic acid          | Quinates          | 338.10                | C <sub>16</sub> H <sub>18</sub> O <sub>8</sub>  | 1899-30-5  | 3.46     | 1.16 | 1.70   | ↑    |
|             | Apigenin 7-rutinoside (Isorhoifolin) | Flavone           | 578.16                | C <sub>27</sub> H <sub>30</sub> O <sub>14</sub> | 552-57-8   | 3.82     | 1.15 | -2.09  | ↓    |
|             | Syringic acid                        | Hydroxycinnamoyls | 198.05                | C <sub>9</sub> H <sub>10</sub> O <sub>5</sub>   | 530-57-4   | 3.35     | 1.12 | 1.20   | ↑    |
|             | Pinoresinol                          | Hydroxycinnamoyls | 358.14                | C <sub>20</sub> H <sub>22</sub> O <sub>6</sub>  | 487-36-5   | 5.36     | 1.16 | 2.16   | ↑    |
|             | Sinapic acid                         | Hydroxycinnamoyls | 224.07                | C <sub>11</sub> H <sub>12</sub> O <sub>5</sub>  | 530-59-6   | 3.74     | 1.03 | 1.21   | ↑    |
|             | Quinic acid                          | Quinates          | 192.06                | C <sub>7</sub> H <sub>12</sub> O <sub>6</sub>   | 77-95-2    | 1.13     | 1.17 | -1.54  | ↓    |
|             | Luteolin 7-O-glucoside (Cynaroside)  | Flavone           | 448.10                | C <sub>21</sub> H <sub>20</sub> O <sub>11</sub> | 5373-11-5  | 3.79     | 1.06 | -1.05  | ↓    |
|             | Tricetin                             | Flavone           | 302.04                | C <sub>15</sub> H <sub>10</sub> O <sub>7</sub>  | 520-31-0   | 4.38     | 1.13 | -1.32  | ↓    |
